# Supplementary material for: Injectable thermo-responsive nano-hydrogel loading triptolide for the anti-breast cancer enhancement via localized treatment based on “two strikes” effects
Source: PubMed Central journal article supplement — Acta Pharm Sin B. 2020 Jun 20;10(11):2227–45. doi: 10.1016/j.apsb.2020.05.011 (PMC7715064; doi:10.1016/j.apsb.2020.05.011), 2020-06-20
Supplement: mmc1.pdf [file mmc1.pdf]

# Supporting Information for

## ORIGINAL ARTICLE

**Injectable thermo-responsive nano-hydrogel loading triptolide for the anti-breast cancer enhancement *via* localized treatment based on “two strikes” effects**

**Yaoyao Luo<sup>a,†</sup>, Jingjing Li<sup>b,†</sup>, Yichen Hu<sup>c</sup>, Fei Gao<sup>a</sup>, George Pak-Heng Leung<sup>b</sup>, Funeng Geng<sup>a,d</sup>, Chaomei Fu<sup>a,\*</sup>, Jinming Zhang<sup>a,\*</sup>**

<sup>a</sup>*College of Pharmacy, Chengdu University of Traditional Chinese Medicine, Chengdu 611137, China*

<sup>b</sup>*Department of Pharmacology and Pharmacy, University of Hong Kong, Hong Kong 999077, China*

<sup>c</sup>*College of Pharmacy and Biological Engineering, Chengdu University, Chengdu 610100, China*

<sup>d</sup>*Sichuan Key Laboratory of Medical American Cockroach, Chengdu 615000, China*

\*Corresponding authors. Tel.: +86 028 61800231 (Chaomei Fu); +86 13551043885 (Jinming Zhang).

E-mail addresses: [chaomeifu@126.com](mailto:chaomeifu@126.com) (Chaomei Fu); [cdutcmzjm@126.com](mailto:cdutcmzjm@126.com) (Jinming Zhang).

<sup>†</sup>These authors made equal contributions to this work.

### MW Averages

Mp: 42044

Mn: 29106

Mv: 58674

Mw: 58491

Mz: 161138

Mz+1: 2728701

PD: 2.0095

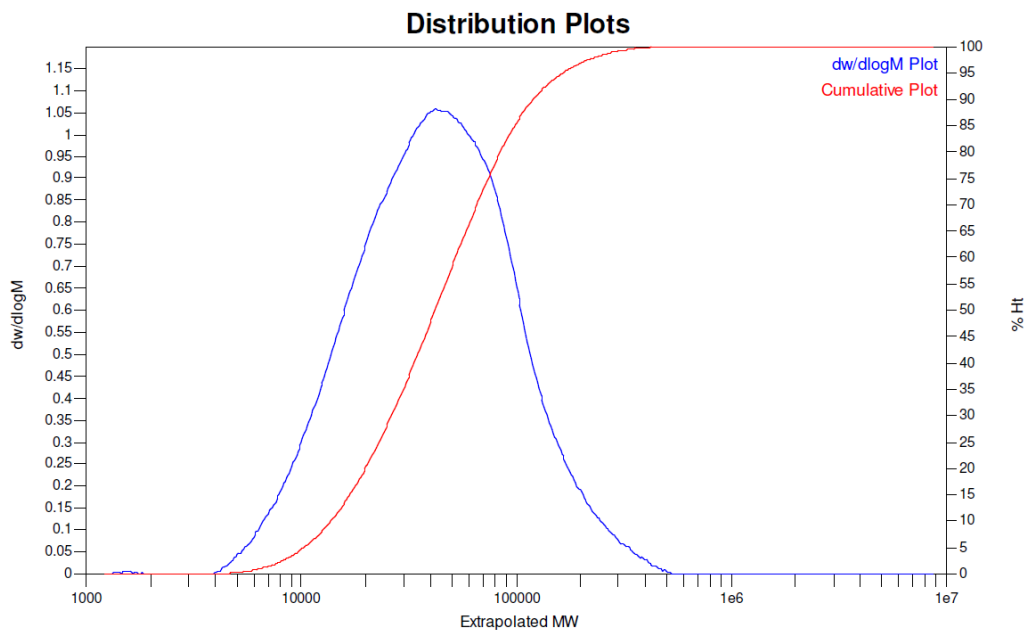

Figure S1 GPC analysis result of P(NIPAAm-co-AAc)-g-F68 copolymer.

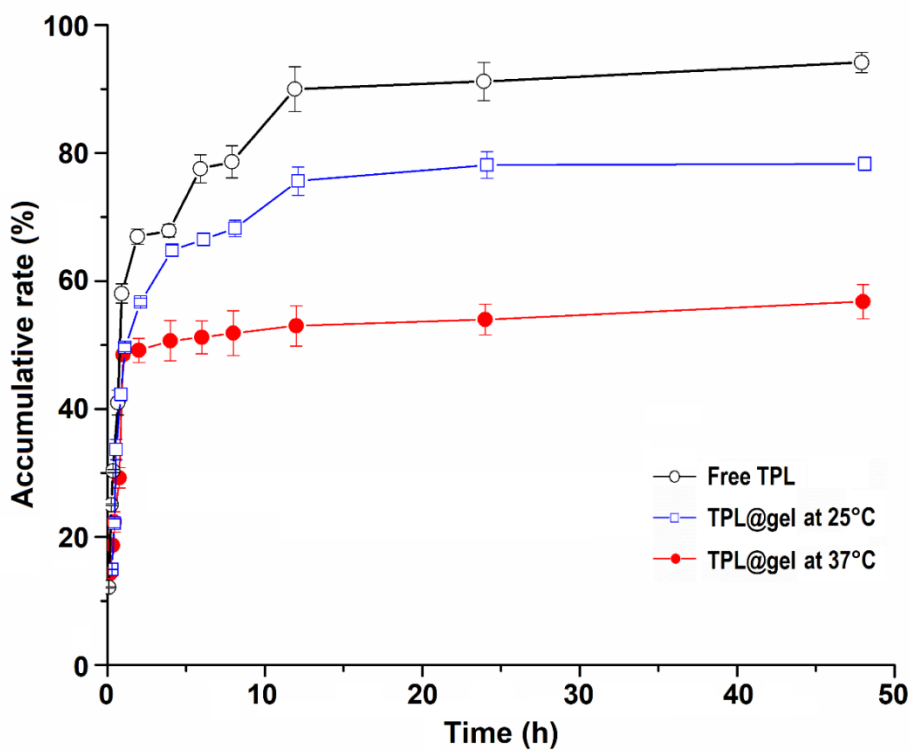

Figure S2 Cumulative release of TPL from hydrogels at 25 and 37 °C from 0 to 48 h (n=3).

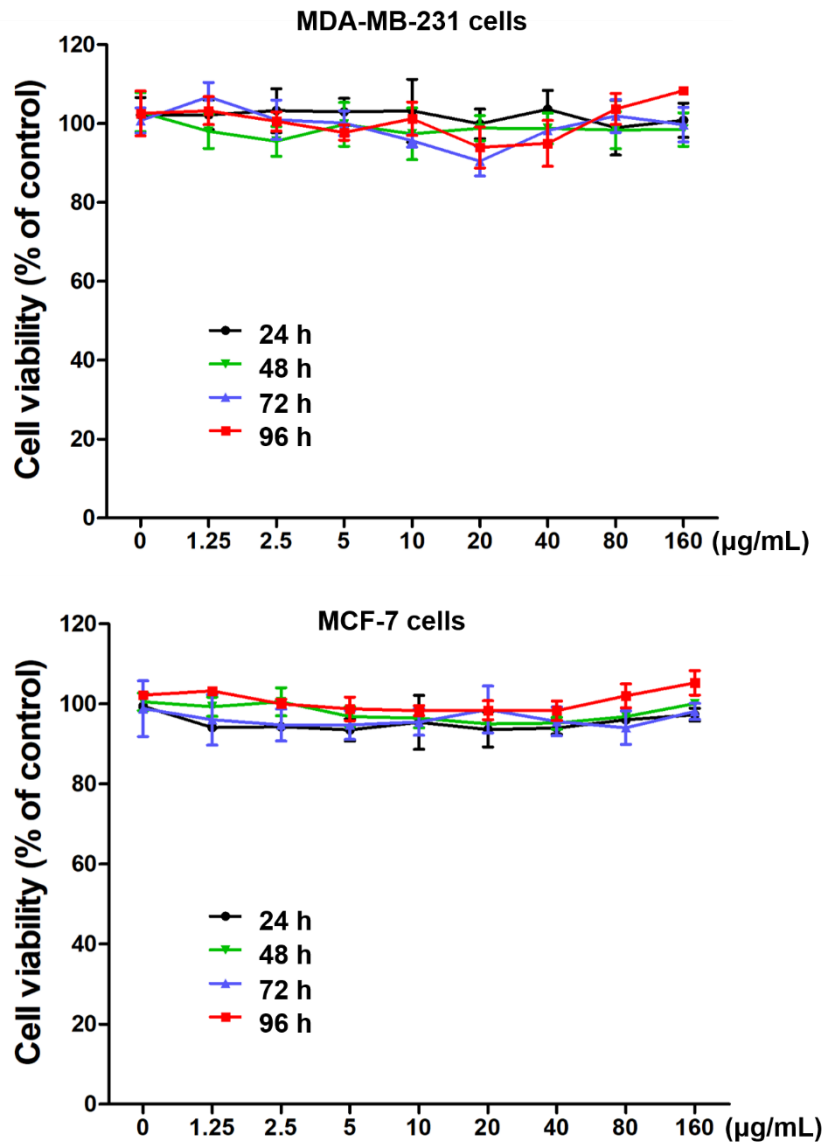

**Figure S3** Cytotoxicity of blank gel against MDA-MB-231 and MCF-7 cells after treatment for different times ( $n=6$ ).

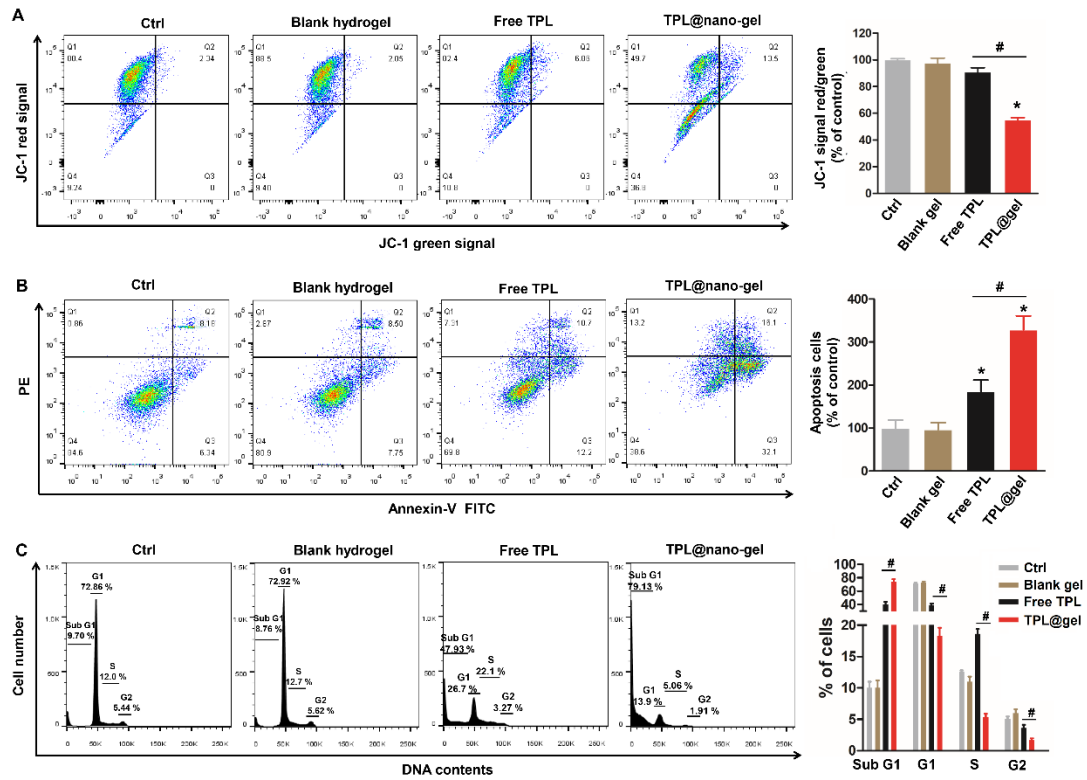

**Figure S4** Effects of TPL@nano-gel on mitochondrial membrane potential (A), apoptosis (B) and cell cycle progression (C) of MCF-7 cells using flow cytometry. MCF-7 cells were treated with or without blank gel (160  $\mu\text{g}/\text{mL}$ ), or free TPL (20  $\text{nmol}/\text{L}$ ) and TPL@nano-gel (20  $\text{nmol}/\text{L}$ ) for 48 h. \* $P < 0.05$  versus the control group. # $P < 0.05$  free TPL versus TPL@nano-gel group
